# Supplementary material for: Towards a psychology of machines: large language models predict human memory
Source: PeerJ journal article supplement (doi:10.7717/peerj-cs.3324), 2025-10-31
Supplement: SuppTable1.docx [file SuppTable1.docx]

# Supplementary Table 1

List of the used garden-path, fitting context, and unfitting context sentences

| **ID** | **Fitting Context** | **Unfitting Context** | **Garden-Path Sentence** | **Reference** |
| --- | --- | --- | --- | --- |
| 1 | Bill has chronic alcoholism. | Bill likes to play golf. | Because Bill drinks wine is never kept in the house. | Ferreira, F., & Henderson, J. M. (1991). Recovery from misanalyses of garden-path sentences. Journal of Memory and Language, 30 (6), 725-745. |
| 2 | Elderly people are in control. | The birds flew to the south. | The old man the boat. | Di Sciullo, A. M. (2005). UG and External Systems. In Linguistik aktuell. <https://doi.org/10.1075/la.75> |
| 3 | The soldiers won’t have problems about accommodation. | A terrible accident happened down the street. | The complex houses married and single soldiers and their families. | Petrie, H.; Darzentas, J.; Walsh, T. (2016). Universal Design 2016: Learning from the Past, Designing for the Future: Proceedings of the 3rd International Conference on Universal Design (UD 2016), York, United Kingdom, August 21 – 24, 2016. IOS Press. p. 463. ISBN 9781614996842. |
| 4 | He suddenly leaves without telling anyone. | The climate change becomes worse every day. | The man who hunts ducks out on weekends. | Slabakova, R. (2016). Second Language Acquisition. Oxford University Press. |
| 5 | She wasn’t agreeing about kids being loud. | A huge wildfire started in the north. | I convinced her children are noisy. | Slabakova, R. (2016). Second Language Acquisition. Oxford University Press. |
| 6 | His job was to adjust the pianos. | The dodo bird became extinct years ago. | The man who whistles tunes pianos. | Slabakova, R. (2016). Second Language Acquisition. Oxford University Press. |
| 7 | The oil people consume is unhealthy. | The school president elections will be held today. | Fat people eat accumulates. | Slabakova, R. (2016). Second Language Acquisition. Oxford University Press. |
| 8 | Tom was doing his chores in the kitchen. | She was feeling very tired today. | While Tom was washing the dishes fell on the floor. | DCODR Wordsmithing tools. (n.d.). <https://wordsmithingtools.com/list-of-garden-path-sentences> |
| 9 | The men of the village go deer hunting on weekends. | The new videos of an UFO are all over social media. | When the men hunt the birds typically scatter. | Ferreira, F., & Henderson, J. M. (1991). Recovery from misanalyses of garden-path sentences. Journal of Memory and Language, 30 (6), 725-745. |
| 10 | Attacking a dog is a very dangerous thing. | He bought the favorite game of his friend as a birthday present. | When the boys strike the dog kills. | Ferreira, F., & Henderson, J. M. (1991). Recovery from misanalyses of garden-path sentences. Journal of Memory and Language, 30 (6), 725-745. |
| 11 | Martians won the war against human beings. | His favorite goldfish died. | After the Martians invaded the town was evacuated. | Ferreira, F., & Henderson, J. M. (1991). Recovery from misanalyses of garden-path sentences. Journal of Memory and Language, 30 (6), 725-745. |
| 12 | The boy was itching all over. | He said he hated his new haircut. | While the boy scratched the dog yawned loudly. | Ferreira, F., & Henderson, J. M. (1991). Recovery from misanalyses of garden-path sentences. Journal of Memory and Language, 30 (6), 725-745. |
| 13 | The concert of the orchestra was great at the beginning. | France is the 13th country I have been to. | After the musician played the piano was wheeled off of the stage. | Goldstein, E. B. (2014). Cognitive psychology: Connecting mind, research and everyday experience. Cengage Learning. |
| 14 | The man was in the forest expecting to hunt a bird. | He bought the painting for 45 million Euros. | While the man hunted the deer ran into the woods. | Christianson, K., Hollingworth, A., Halliwell, J. F., & Ferreira, F.  (2001). Thematic roles assigned along the garden path linger.  Cognitive psychology, 42 (4), 368-407. |
| 15 | The lawyer wanted to take a look at the proofs for the homicide. | I became a yoga instructor after 7 years of work. | The evidence examined by the lawyer turned out to be unreliable. | Ferreira, F., & Clifton Jr, C. (1986). The independence of syntactic processing. Journal of memory and language, 25 (3), 348-368. |
| 16 | Fred always wastes his meals. | She fell down the stairs and broke her arm. | When Fred eats food gets thrown. | Slabakova, R. (2016). Second Language Acquisition. Oxford University Press. |
| 17 | The author commented about a novel on the forum website. | He stayed hungry all day due to forgetting his wallet. | The author wrote the novel was likely to be a best-seller. | Towards Natural Language Processing: A Well-Formed Substring Table Approach to Understanding Garden Path Sentence. (2010, November 1). IEEE Conference Publication | IEEE Xplore. <https://ieeexplore.ieee.org/abstract/document/5659102> |
| 18 | The child was attacked by a dog. | She was studying for her finals very hard. | Mary gave the child the dog bit a bandaid. | Slabakova, R. (2016). Second Language Acquisition. Oxford University Press. |
| 19 | There are very bad-tempered people around. | He became the new editor of the journal. | The sour drink from the ocean. | “The horse raced past the barn fell”: A guide to garden path sentences. (n.d.). <https://effectiviology.com/avoid-garden-path-sentences-in-your-writing/> |
| 20 | She helped a lot on this project. | The party got cancelled due to weather conditions. | Without her contributions would be impossible. | “The horse raced past the barn fell”: A guide to garden path sentences. (n.d.). <https://effectiviology.com/avoid-garden-path-sentences-in-your-writing/> |
| 21 | The dog never liked John. | She was so angry because her partner forgot their 7th anniversary of their wedding day. | Wherever John walks the dog chases him. | “The horse raced past the barn fell”: A guide to garden path sentences. (n.d.). <https://effectiviology.com/avoid-garden-path-sentences-in-your-writing/> |
| 22 | He never gets tired of running. | He forgot to close the window now the room is all wet due to rain. | Because he always jogs a mile seems a short distance to him. | “The horse raced past the barn fell”: A guide to garden path sentences. (n.d.). <https://effectiviology.com/avoid-garden-path-sentences-in-your-writing/> |
| 23 | I was searching for an article related to my project. | Everyone was shocked about the death of the popular singer. | While I was surfing the internet went down. | “The horse raced past the barn fell”: A guide to garden path sentences. (n.d.). <https://effectiviology.com/avoid-garden-path-sentences-in-your-writing/> |
| 24 | He was having his lunch. | The animals in the farm were dying because of a serious disease. | While the man was eating the pizza was still being reheated in the oven. | “The horse raced past the barn fell”: A guide to garden path sentences. (n.d.). <https://effectiviology.com/avoid-garden-path-sentences-in-your-writing/> |
| 25 | This neighborhood is not safe. | A drunk driver hit a tree yesterday night. | Until the police arrest the criminals control the street. | Slabakova, R. (2016). Second Language Acquisition. Oxford University Press. |
| 26 | The team players and the coach gave a little break from the workout. | She got jealous when she learned she will have a new sister. | The coach smiled at the player tossed the frisbee. | Tabor, W., Galantucci, B., & Richardson, D. C. (2004). Effects of merely local syntactic coherence on sentence processing. Journal of Memory and Language, 50 (4), 355–370. <https://doi.org/10.1016/j.jml.2004.01.001> |
| 27 | Elderly people always closely track young people. | He was very upset because the tickets for the concert of his favorite band was sold out. | The old dog the footsteps of the young. | Smyth, M. M. (1994). Cognition in action. Psychology Press. |
| 28 | Amber’s mother prepared a nice dinner for thanksgiving. | She couldn’t decide which shoes to wear for her outfit. | While Amber hunted the turkey was on the table. | Schütt, E., Dudschig, C., Bergen, B. K., & Kaup, B. (2023). Sentence-based mental simulations: Evidence from behavioral experiments using garden-path sentences. Memory & Cognition, 51 (4), 952-965. |
| 29 | Zoe finally had some alone time. | The formula 1 race in Monaco was very exciting. | As Zoe bathed the baby slept in the bed. | Schütt, E., Dudschig, C., Bergen, B. K., & Kaup, B. (2023). Sentence-based mental simulations: Evidence from behavioral experiments using garden-path sentences. Memory & Cognition, 51 (4), 952-965. |
| 30 | Ryan won the tough race. | The raise in prices made the citizens very angry. | While Ryan won the car was in poor condition. | Schütt, E., Dudschig, C., Bergen, B. K., & Kaup, B. (2023). Sentence-based mental simulations: Evidence from behavioral experiments using garden-path sentences. Memory & Cognition, 51 (4), 952-965. |
| 31 | Samuel went to the new and nice restaurant. | The newly graduated architect got the very prestiged prize. | While Samuel ordered the fish swam upstream. | Schütt, E., Dudschig, C., Bergen, B. K., & Kaup, B. (2023). Sentence-based mental simulations: Evidence from behavioral experiments using garden-path sentences. Memory & Cognition, 51 (4), 952-965. |
| 32 | Mary was having her dinner in the evening. | She realized her bike got stolen. | As Mary ate the egg was in the fridge. | Schütt, E., Dudschig, C., Bergen, B. K., & Kaup, B. (2023). Sentence-based mental simulations: Evidence from behavioral experiments using garden-path sentences. Memory & Cognition, 51 (4), 952-965. |
| 33 | Edward was working on a new artwork. | She prepared nothing to serve to her guests. | While Edward painted the house was afire. | Schütt, E., Dudschig, C., Bergen, B. K., & Kaup, B. (2023). Sentence-based mental simulations: Evidence from behavioral experiments using garden-path sentences. Memory & Cognition, 51 (4), 952-965. |
| 34 | Eve went for a walk around the neighborhood. | I tried bungee jumping for the very first time yesterday. | As Eve walked the dog lay on the ground. | Schütt, E., Dudschig, C., Bergen, B. K., & Kaup, B. (2023). Sentence-based mental simulations: Evidence from behavioral experiments using garden-path sentences. Memory & Cognition, 51 (4), 952-965. |
| 35 | Miranda was preparing the cocktail. | Because she was late for class, her teacher didn’t let her in. | While Miranda stirred the coffee was roasted. | Schütt, E., Dudschig, C., Bergen, B. K., & Kaup, B. (2023). Sentence-based mental simulations: Evidence from behavioral experiments using garden-path sentences. Memory & Cognition, 51 (4), 952-965. |
| 36 | Anna was trying on her new clothes. | She got rescued 9 hours later of her ski accident. | While Anna dressed the baby spit up on the bed. | Ferreira, F., Christianson, K., & Hollingworth, A. (2001). Misinterpretations of garden-path sentences: Implications for models of sentence processing and reanalysis. Journal of psycholinguistic research, 30, 3-20. |
| 37 | The chef came up with a delicious recipe. | The ministry warned people about not going out due to adverse weather condition. | The chef declared to the reporters he baked the public would be impressed. | Waters, G. S., & Caplan, D. (1996). Processing resource capacity and the comprehension of garden path sentences. Memory & Cognition, 24 (3), 342-355. |
| 38 | The suspect confessed something to his lawyer during court. | He couldn’t watch the new episode of the series. | The defendant confided to the lawyer he admired the judge was his brother. | Waters, G. S., & Caplan, D. (1996). Processing resource capacity and the comprehension of garden path sentences. Memory & Cognition, 24 (3), 342-355. |
| 39 | The man dropped by his uncle. | He said he hated the food at the restaurant. | While the man was visiting the children who were surprisingly pleasant and funny played outside. | Van Gompel, R. P., Pickering, M. J., Pearson, J., & Jacob, G. (2006). The activation of inappropriate analyses in garden-path sentences: Evidence from structural priming. Journal of Memory and Language, 55 (3), 335-362. |
| 40 | The doctor was having his daily visit in the morning. | The best part of the balkan tour was seeing Macedonia. | When the doctor was visiting the patient had a heart attack. | Van Gompel, R. P., Pickering, M. J., Pearson, J., & Jacob, G. (2006). The activation of inappropriate analyses in garden-path sentences: Evidence from structural priming. Journal of Memory and Language, 55 (3), 335-362. |
| 41 | We wouldn’t achieve anything without her. | She insisted on not paying for the pie she didn’t like. | Without her efforts would be in vain. | Luoa, R. (2017). Studies on Garden Path Phenomenon in English. Sociology, 7 (7), 371-375. |
| 42 | The tension of people in the tribunes was increasing. | He got very angry in the airport when he saw his luggage exploded. | The referees warned the spectators would probably get too rowdy. | Ning, L. H., & Shih, C. (2012). Prosodic effects on garden-path sentences. In Speech Prosody 2012. |
| 43 | The student was reading some facts about books. | The anti-bullying program results show that it is not an effective preventive intervention. | The student read a book is good for the mind. | TASK 1: ‘Garden path’ sentences. (n.d.). Retrieved February 29, 2024, from <https://www.math.uni.wroc.pl/~msliw/lingw/mar5zad1.pdf> |
| 44 | The plans of the executives were suggested to the employees for voting. | For tomorrow we plan to go to the beach. | The management plans to cut vacation days are rejected. | Jacqueline. (2016, April 6). Garden Path Sentences – Crazy Sentences that Do Have Meaning. English With a Smile. <https://englishwithasmile.org/2015/01/31/garden-path-sentences-crazy-sentences-that-do-have-meaning/> |
| 45 | New plans were suggested in the parliament by the potency. | I went on a hike today. | The government plans to raise taxes were defeated. | “The horse raced past the barn fell”: A guide to garden path sentences. (n.d.-b). <https://effectiviology.com/avoid-garden-path-sentences-in-your-writing/> |
|  |  |  |  |  |
